# Supplementary material for: Global Mapping of the Macrophage-HIV-1 Transcriptome Reveals that Productive Infection Induces Remodeling of Host Cell DNA and Chromatin
Source: PubMed Central journal article supplement (PMC5507862; doi:10.1038/s41598-017-05566-9), 2017-07-12
Supplement: 41598_2017_5566_MOESM1_ESM.pdf [file 41598_2017_5566_MOESM1_ESM.pdf]

1  
2  
3  
4  
5  
6  
7  
8  
9  
10  
11  
12  
13  
14  
15  
16  
17  
18  
19  
20  
21  
22

**Global Mapping of the Macrophage-HIV-1  
Transcriptome Reveals that Productive Infection Induces  
Remodeling of Host Cell DNA and Chromatin**

Alexandre Deshieri<sup>a</sup>, Charles Joly-Beauparlant<sup>a</sup>, Yann Breton<sup>a</sup>,  
Michel Ouellet<sup>a</sup>, Frédéric Raymond<sup>a</sup>, Robert Lodge<sup>b</sup>, Corinne Barat<sup>a</sup>,  
Marc-André Roy<sup>a</sup>, Jacques Corbeil<sup>a,c</sup>, and Michel J. Tremblay<sup>a, d,#</sup>

<sup>a</sup>Axe des Maladies Infectieuses et Immunitaires, Centre de Recherche du Centre Hospitalier  
Universitaire de Québec-Université Laval, Québec, Canada; <sup>b</sup>Institut de Recherches Cliniques de  
Montréal, Montréal, Québec, Canada; <sup>c</sup>Département de médecine moléculaire, Faculté de  
médecine, Université Laval, Québec, Canada; <sup>d</sup>Département de microbiologie-infectiologie et  
immunologie, Faculté de médecine, Université Laval, Québec, Canada

Running title: HIV-1 affects host DNA and chromatin in macrophages

#Address correspondence to Michel J. Tremblay, [michel.j.tremblay@crchudequebec.ulaval.ca](mailto:michel.j.tremblay@crchudequebec.ulaval.ca)

23

## Supplementary Experimental Procedures

24 **Molecular constructs.** NL/Bal-eGFP and NL/Bal-FLuc were engineered from NLENG1-IRES<sup>1</sup>  
25 (a kind gift from David N. Levy), in which a portion of the wild-type X4 envelope from NL4.3  
26 was replaced with a corresponding fragment of the Bal R5 envelope from pNL4.3 *Bal env*<sup>2</sup>.

27 **Detachment of MØ for flow cytometry analysis and cell sorting.** To overcome the constraint  
28 of sorting heavily adherent cells such as human MØ, Ultra Low Attachment dishes (ULA,  
29 Corning®) were used. These dishes are coated with a hydrophobic gel, which limits cell-surface  
30 interactions. This approach allows a complete differentiation and attachment of MØ in the  
31 presence of M-CSF and strongly facilitates cell detachment when using buffers supplemented  
32 with EDTA. Using these experimental conditions, cell viability was close to 90-100% after cell  
33 detachment (10 min PBS - 5 mM EDTA) whereas cell culture coated or non-treated polystyrene  
34 dishes required >30 min incubation with trypsin-EDTA and usually lead to more than 50%  
35 mortality (unpublished observations). Non-specific binding sites were blocked using a 20 min  
36 incubation period with PBS supplemented with 0.5% BSA, 20% normal goat serum, 10% human  
37 AB serum and 5 mM EDTA. Abs used for flow cytometry and cell sorting studies were tested at  
38 a 1:100 final concentration and purchased from eBioscience (San Diego, CA), except for anti-  
39 p24 (clone KC57) that was obtained from Beckman Coulter (Mississauga, ON). Anti-SAMHD1  
40 mAb was purchased from Cell Signaling Technology (Danvers, MA).

41 **Virus production and infection of MØ.** Virus stocks were prepared by transient transfection of  
42 human embryonic kidney 293T cells using the calcium phosphate precipitation technique, as  
43 previously published<sup>3</sup>. Multiplicity of infection (MOI) of our virus preparations was determined  
44 by calculating the TCID<sub>50</sub> using the Spearman-Kärber method following infection of the

45 indicator cell line TZM-BI<sup>4</sup>. MØ were infected with the NL/Bal-HSA reporter virus at a MOI of  
46 0.1 for immunomagnetic sorting experiments. Controls consisting of mock-infected MØ were  
47 obtained by using cell-free supernatants from 293T cells transiently transfected with an empty  
48 pCDNA3.1 vector. A MOI of 0.5 was used for studies with NL/eBal-GFP and NL/Bal-Fluc  
49 reporter viruses. For all experiments, the virus was diluted in culture medium supplemented with  
50 10% human AB serum. HIV-1 infection was maintained for 72 h without changing the culture  
51 medium.

52 **Viability Assays.** Viability of MØ after siRNA transfection was assessed using CellTiter-Blue  
53 Cell Viability and CellTiter 96 AQueous Non-Radioactive Cell Proliferation Assays (MTS)  
54 following manufacturer's instructions (Promega, Madison, WI).

55 **Western blot analysis.** MØ were reverse transfected with siRNAs either specific for  
56 nonsense/scrambled sequences (used as negative controls) or SAMHD1 and next plated at 2 x  
57 10<sup>5</sup> cells per well in 24 well plates. MØ were lysed for 15 min at 4°C in 150 µL per well of T8  
58 lysis buffer (Urea 7 M, Thiourea 2 M, 3-[(3-cholamidopropyl)dimethylammonio]-1-  
59 propanesulfonate (CHAPS) 3 % (w/v), dithiothreitol (DTT) 20 mM, and 5 mM tris(2-  
60 carboxyethyl)phosphine (TCEP) containing 1% (v/v) of the protease inhibitor solution P8340  
61 (Sigma Aldrich, Saint-Louis, MO). Protein concentrations of MØ lysates were determined by a  
62 Bradford assay using Quick Start™ Bradford 1x Dye Reagent (Bio-Rad, Mississauga, ON).  
63 Total lysates from MØ were frozen at -80°C until used. MØ lysates (20 µg per lane) were  
64 separated on a 10% SDS-PAGE and transferred on a 0.45 µm PVDF membrane (Thermo Fisher  
65 Scientific). Molecular weight markers (RPN800E; GE Healthcare, Mississauga, ON) were also  
66 loaded to determine the molecular weight of target proteins. Protein expression was monitored  
67 by standard immunoblotting techniques using primary Abs directed against HIV-1 p24 protein

68 (clone 183-H12-5C, 1:1000; cat#1513; NIH AIDS Reagent program) and actin (goat anti-hActin,  
69 1:2000, clone I-19; Santa Cruz Biotechnology; Dallas, TX) as a loading control. Non-specific  
70 binding sites of the PVDF membrane were first blocked in PBS supplemented with 0.1% (v/v)  
71 Tween-20 (PBST) and 5% BSA (Fraction V Standard Grade Bovine Serum Albumin, Cohn  
72 Fraction V from Fitzgerald Industries International, Acton, MA) for 1 hr at room temperature  
73 before being incubated with primary Abs overnight at 4°C in blocking buffer. Membranes were  
74 then washed three times in PBST and incubated for 1h with HRP-conjugated secondary Abs (rat  
75 anti-mouse IgG from Rockland Immunochemicals, Limerick, PA; donkey anti-goat IgG from  
76 Santa Cruz Biotechnology) diluted at 1:10 000 in PBST. Membranes were again washed three  
77 times in PBST before adding ECL substrate (Western Lightning Plus-ECL; Perkin Elmer) and  
78 exposed on film (Universal X-ray, Pointe-Claire, QC). Films were developed and scanned.  
79 Minimal brightness and contrast processing of the scanned image were performed using Adobe  
80 Photoshop CS5 and the figure was generated using Adobe Illustrator CS5.

81 **RNA-sequencing analyses.** The Trimmomatic v0.30 software was used to trim fastq sequences  
82 and remove adapters using an ILLUMINACLIP of 2:30:15, a TRAILING of 30 and a MINLEN  
83 of 32 (A.M. Bolger, M. Lohse, and B. Usadel, *Bioinformatics* 30:2114-2120, 2014). The reads  
84 were aligned on the hg19 genome using Tophat v2.0.8b using fr-unstranded library-type and  
85 using gene annotations downloaded from UCSC on March 9, 2012 (through Illumina iGenomes).  
86 Duplicates were marked and reads were sorted using the MarkDuplicates and SortSam  
87 algorithms from Picard tools v1.88. Raw counts were obtained with htseq-count v0.5.4p1 and  
88 FPKM were calculated using Cufflinks v2.0.2 with a max-bundle-frags value of 1000000000 and  
89 afr-unstranded library-type<sup>5</sup>. Differential gene expression was computed with the EdgeR  
90 package v3.4.2 with normalization to data from mock-infected cells as described previously<sup>6</sup>.

91 Enrichment of each cell population and the specificity of the associated sequencing reads were  
92 assessed by an alignment to the HIV-1 genome. The coverage was evaluated with the human  
93 genome (Hg19) alignment. A total of 21800 different human transcripts could be detected in MØ  
94 with coverage of 100 million reads per sample. Among them, 18013 transcripts were  
95 corresponding to protein-coding mRNA sequences and we could compare the expression of  
96 11220 transcripts in the different conditions after applying a transcript detection threshold (TDT)  
97 limit of 0.1 fragment per kilobase per million of RNAseq reads.

98 **Gene ontology and pathway networks analysis.** Lists of genes were selected applying a cut-off  
99 of 1.5 for Fold-Change and  $p < 0.001$  for  $p$  values. To decipher functionally grouped gene  
100 ontology and pathway annotation networks, functional enrichment analysis was performed using  
101 ClueGO, a cytoscape plugin. The statistical test used Reactome 05.05.2015<sup>7,8</sup> for the enrichment  
102 analysis was a right-sided hypergeometric test with a Benjamini-Hochberg correction and a  
103 kappa score of 0.4, GO Term grouping (Pathway/Network connectivity), and a medium network  
104 specificity (Homo sapien, 3 minimum genes, 3 % genes;  $pV < 0.05$ )<sup>9,10</sup>. Signaling networks were  
105 obtained from STRING 9.1 with experiments active prediction methods and a confidence score  
106 of 0.400 (medium)<sup>11,12</sup>. Analyses of transcription factor regulation enrichments were performed  
107 with the Database for Annotation, Visualization and Integrated Discovery (DAVID 6.8)<sup>13,14</sup>  
108 using the Protein Interaction tool (UCSC TFBS, Homo Sapiens). For receptor-associated  
109 signaling pathways, we used EnrichNet Network-based enrichment analysis<sup>15,16</sup>, applying the  
110 NCI-Nature Pathway Interaction and STRING networks databases.

111 **Statistical analysis.** Means of raw data were compared using the two-way ANOVA with Sidak's  
112 multiple comparison tests.  $P$  values lower than 0.05 were deemed statistically significant.

113 Calculations were performed with the GraphPad Prism version 6.02 for Windows (GraphPad  
114 Software, La Jolla, CA).

115

## Supplementary Figure Legends

116 **Figure S1. Kinetics of NL/Bal-HSA replication in MØ and purity of HSA<sup>neg</sup> and HSA<sup>pos</sup>**

117 **fractions isolated by immunomagnetic sorting.** (A) MØ from three distinct donors were

118 inoculated with increasing amounts of NL/Bal-HSA (MOI ranging from 0.004 to 2.5) and virus-

119 mediated reporter gene activity was assessed at 6 dpi. Data are presented as the mean of triplicate

120 samples  $\pm$  SD. (B) MØ from three different donors were infected with NL/Bal-HSA (MOI: 1)

121 and virus replication was measured at the indicated time points. Data are presented as the mean

122 of triplicate samples  $\pm$  SD. (C) MØ were infected with NL/Bal-HSA before isolation of HSA<sup>neg</sup>

123 and HSA<sup>pos</sup> populations by immunomagnetic sorting at 36 and 72 hpi. Finally, immunocaptured

124 cells were subjected to western blotting analyses using anti-p24 (clone 183-H12-5C) and anti-

125 actin (clone I-19) mAbs. The results shown are representative from 1 out of 3 independent

126 experiments. (D) MØ were infected with NL/Bal-HSA before isolation of HSA<sup>neg</sup> and HSA<sup>pos</sup>

127 populations by immunomagnetic sorting at 24, 72 hpi and 6 dpi. Mock-infected MØ were used

128 as negative controls. Next, levels of Tat mRNA and 18S rRNA were measured by qRT-PCR

129 analyses. Data are presented as the mean of triplicate samples  $\pm$  SD. The results shown are

130 representative from 1 out of 3 independent experiments.

131 **Figure S2. Comparative analyses of DEGs in HSA<sup>neg</sup> and HSA<sup>pos</sup> MØ at 36 hpi and 6 dpi.**

132 A Venn diagram analysis of Differentially Expressed Genes (DEGs) at 36 hpi and 6dpi shows a

133 time-dependent regulation of host gene transcription in HSA<sup>neg</sup> and HSA<sup>pos</sup> MØ. The listed

134 numbers indicate the total number of genes in each area. Diagrams were generated at

135 <http://bioinformatics.psb.ugent.be/webtools/Venn/>. A complete list displaying the distribution of

136 of DEGs is depicted in the Supplementary Table S3, whereas the corresponding enriched

137 pathways are presented in the Supplementary Table S4.

138 **Figure S3. Type-I IFN-related response is seen in both HSA<sub>neg</sub> and HSA<sub>pos</sub> cell fractions.**

139 MØ were infected with NL/Bal-HSA before isolation of HSA<sub>neg</sub> and HSA<sub>pos</sub> populations using  
140 an immunomagnetic sorting approach at 36 hpi and 6 dpi. Mock-infected MØ were used as  
141 negative controls. Next, RNAseq analyses were performed in studied cell samples. Data are  
142 presented as Log<sub>2</sub> FC of FPKM. Transcriptional expression of numerous genes linked with the  
143 type-I IFN-associated response was monitored and compared in both HSA<sub>neg</sub> and HSA<sub>pos</sub> MØ  
144 (panel A: *interferon-inducible (IFI)*, *interferon-induced proteins with tetraco peptide repeats*  
145 (*IFIT*) and *interferon inducible trans-membrane (IFITM)* genes; panel B: *tripartite motif (TRIM)*  
146 genes; panel C: *IFN-regulated factor (IRF)* genes; and panel D: *Toll-like receptor (TLR)* genes.

147 **Figure S4. HIV-1 induces chromatin reorganization early after infection.** MØ were infected

148 with NL/Bal-HSA before isolation of HSA<sub>neg</sub> and HSA<sub>pos</sub> populations by immunomagnetic  
149 sorting at 36 hpi and 6 dpi. Mock-infected MØ were used as negative controls. Next, RNAseq  
150 analyses were performed in studied cell samples. Data are presented as Log<sub>2</sub> FC of FPKM.  
151 Transcriptional expression of several histone family members was assessed and compared in  
152 both HSA<sub>neg</sub> and HSA<sub>pos</sub> MØ.

153 **Figure S5. HIV-1 induces type-I IFN signaling in both HSA<sub>neg</sub> and HSA<sub>pos</sub> MØ.** (A)

154 Comparative analysis of DEGs in both HSA<sub>neg</sub> and HSA<sub>pos</sub> MØ using Database for  
155 Annotation, Visualization and Integrated Discovery (DAVID) indicate that regulation of genes  
156 associated with Interferon Regulatory Factors (IRF) transcriptional activity occurs in both MØ  
157 populations at 6 dpi. (B) A similar analysis for cytokine/receptor-associated pathways using  
158 EnrichNet shows that IFN- $\gamma$  downstream signaling events are modulated in both HSA<sub>neg</sub> and  
159 HSA<sub>pos</sub> MØ at 6 dpi. Detailed lists of enriched transcription factors and cytokine/receptor-  
160 associated downstream signaling pathways are listed in Supplementary Tables S7 and S8,



161 respectively. (C) Comparative analyses between DEGs in HSA<sup>neg</sup> MØ and lists of genes  
162 previously described to be modulated in MØ treated with IFN- $\gamma$  and LPS (M1 phenotype) or IL-  
163 4/IL-13 (M2 phenotype)<sup>17-19</sup> shows that no particular polarization occurs in these cells at 36 hpi.  
164 Interestingly, 23 M1-associated DEGs were found to be transcriptionally modulated in HSA<sup>pos</sup>  
165 MØ at 36 hpi. (D) Similar analyses demonstrate that a large panel of M1-associated DEGs (i.e.  
166 42) linked to type-I IFN signaling is regulated in HSA<sup>neg</sup> cells without induction of M2-  
167 associated DEGs at 6 dpi. A comparable profile of M1-associated DEGs is detected in HSA<sup>pos</sup>  
168 MØ at 6 dpi with no particular modulation of M2-associated DEGs. A complete list of the  
169 repartition of DEGS is presented in the Supplementary Table S9. All Venn diagrams were  
170 generated at <http://bioinformatics.psb.ugent.be/webtools/Venn/>. The numbers shown indicate the  
171 total numbers in each area.

172 **Figure S6. siRNA-based screening to search for host factors modulating HIV-1 replication**

173 **in MØ.** (A) Transcriptional expression of SAMHD1 (left panel) and CD4 (right panel) is  
174 reduced when using sequence-specific siRNAs. Data are presented as the mean  $\pm$  SD of triplicate  
175 samples. Asterisks denote statistically significant data ( $***p < 0.001$ ;  $****p < 0.0001$ ). (B)  
176 Analysis of MØ viability after siRNA transfection shows that this experimental approach induces  
177 minimal cell toxicity. Indeed, both CellTiter-Blue cell viability assay and CellTiter 96 AQueous  
178 Non-Radioactive cell proliferation Assay (MTS) experiments show homogeneous distribution of  
179 the different transfected siRNA conditions. Data are presented as the mean  $\pm$  SD of three  
180 independent experiments.

181 **Figure S7. Flow cytometry analysis of human monocyte-derived MØ used in our work.**

182 Human monocyte-derived MØ from 4 distinct healthy donors were labeled first with monoclonal  
183 antibodies specific for the pan-macrophage marker CD68 (as suggested by the Referee), T-cell

184 marker CD3, and B-cell marker CD19. Next, cells were blocked with 20% NGS/10% human AB  
185 serum/1% BSA/5mM EDTA and labelled with conjugated secondary antibodies before flow  
186 cytometry analyses.

187

## References

- 189 1 Levy, D., Aldrovandi, G., Kutsch, O. & Shaw, G. Dynamics of HIV-1 recombination in  
190 its natural target cells. *Proceedings of the National Academy of Sciences of the United*  
191 *States of America* **101**, 4204 (2004).
- 192 2 Dornadula, G., Zhang, H., Shetty, S. & Pomerantz, R. HIV-1 virions produced from  
193 replicating peripheral blood lymphocytes are more infectious than those from  
194 nonproliferating macrophages due to higher levels of intravirion reverse transcripts:  
195 implications for pathogenesis and transmission. *Virology* **253**, 10 (1999).
- 196 3 Cantin, R., Fortin, J. & Tremblay, M. The amount of host HLA-DR proteins acquired by  
197 HIV-1 is virus strain-and cell type-specific. *Virology* **218**, 372 (1996).
- 198 4 Platt, E. J., Wehrly, K., Kuhmann, S. E., Chesebro, B. & Kabat, D. Effects of CCR5 and  
199 CD4 Cell Surface Concentrations on Infections by Macrophagetropic Isolates of Human  
200 Immunodeficiency Virus Type 1. *Journal of Virology* **72**, 2855 (1998).
- 201 5 Trapnell, C. *et al.* Differential gene and transcript expression analysis of RNA-seq  
202 experiments with TopHat and Cufflinks. *Nature protocols* **7**, 562-578 (2012).
- 203 6 Robinson, M. D., McCarthy, D. J. & Smyth, G. K. edgeR: a Bioconductor package for  
204 differential expression analysis of digital gene expression data. *Bioinformatics* **26**, 139  
205 (2010).
- 206 7 Fabregat, A. *et al.* The Reactome pathway Knowledgebase. *Nucleic Acids Res* **44**, D481-  
207 487, doi:10.1093/nar/gkv1351 (2016).
- 208 8 Croft, D. *et al.* The Reactome pathway knowledgebase. *Nucleic Acids Res* **42**, D472-477,  
209 doi:10.1093/nar/gkt1102 (2014).

- 210 9 Bindea, G. *et al.* ClueGO: a Cytoscape plug-in to decipher functionally grouped gene  
211 ontology and pathway annotation networks. *Bioinformatics* **25**, 1091 (2009).
- 212 10 Shannon, P. *et al.* Cytoscape: A Software Environment for Integrated Models of  
213 Biomolecular Interaction Networks. *Genome Research* **13**, 2498 (2003).
- 214 11 Snel, B., Lehmann, G., Bork, P. & Huynen, M. STRING: a web-server to retrieve and  
215 display the repeatedly occurring neighbourhood of a gene. *Nucleic Acids Research* **28**,  
216 3442 (2000).
- 217 12 Franceschini, A. *et al.* STRING v9. 1: protein-protein interaction networks, with  
218 increased coverage and integration. *Nucleic Acids Research* **41**, D808 (2013).
- 219 13 Huang, D. W. *et al.* The DAVID Gene Functional Classification Tool: a novel biological  
220 module-centric algorithm to functionally analyze large gene lists. *Genome Biol* **8**, R183,  
221 doi:10.1186/gb-2007-8-9-r183 (2007).
- 222 14 Huang, D. W. *et al.* DAVID Bioinformatics Resources: expanded annotation database  
223 and novel algorithms to better extract biology from large gene lists. *Nucleic Acids Res* **35**,  
224 W169-175, doi:10.1093/nar/gkm415 (2007).
- 225 15 Glaab, E., Baudot, A., Krasnogor, N., Schneider, R. & Valencia, A. EnrichNet: network-  
226 based gene set enrichment analysis. *Bioinformatics* **28**, i451-i457,  
227 doi:10.1093/bioinformatics/bts389 (2012).
- 228 16 Schaefer, C. F. *et al.* PID: the Pathway Interaction Database. *Nucleic Acids Res* **37**,  
229 D674-679, doi:10.1093/nar/gkn653 (2009).
- 230 17 Cassol, E., Cassetta, L., Alfano, M. & Poli, G. Macrophage polarization and HIV-1  
231 infection. *Journal of leukocyte biology* **87**, 599 (2010).

- 232 18 Becker, M. *et al.* Integrated Transcriptomics Establish Macrophage Polarization  
233 Signatures and have Potential Applications for Clinical Health and Disease. *Sci Rep* **5**,  
234 13351, doi:10.1038/srep13351 (2015).
- 235 19 Martinez, F. O., Gordon, S., Locati, M. & Mantovani, A. Transcriptional profiling of the  
236 human monocyte-to-macrophage differentiation and polarization: new molecules and  
237 patterns of gene expression. *J Immunol* **177**, 7303-7311 (2006).

238

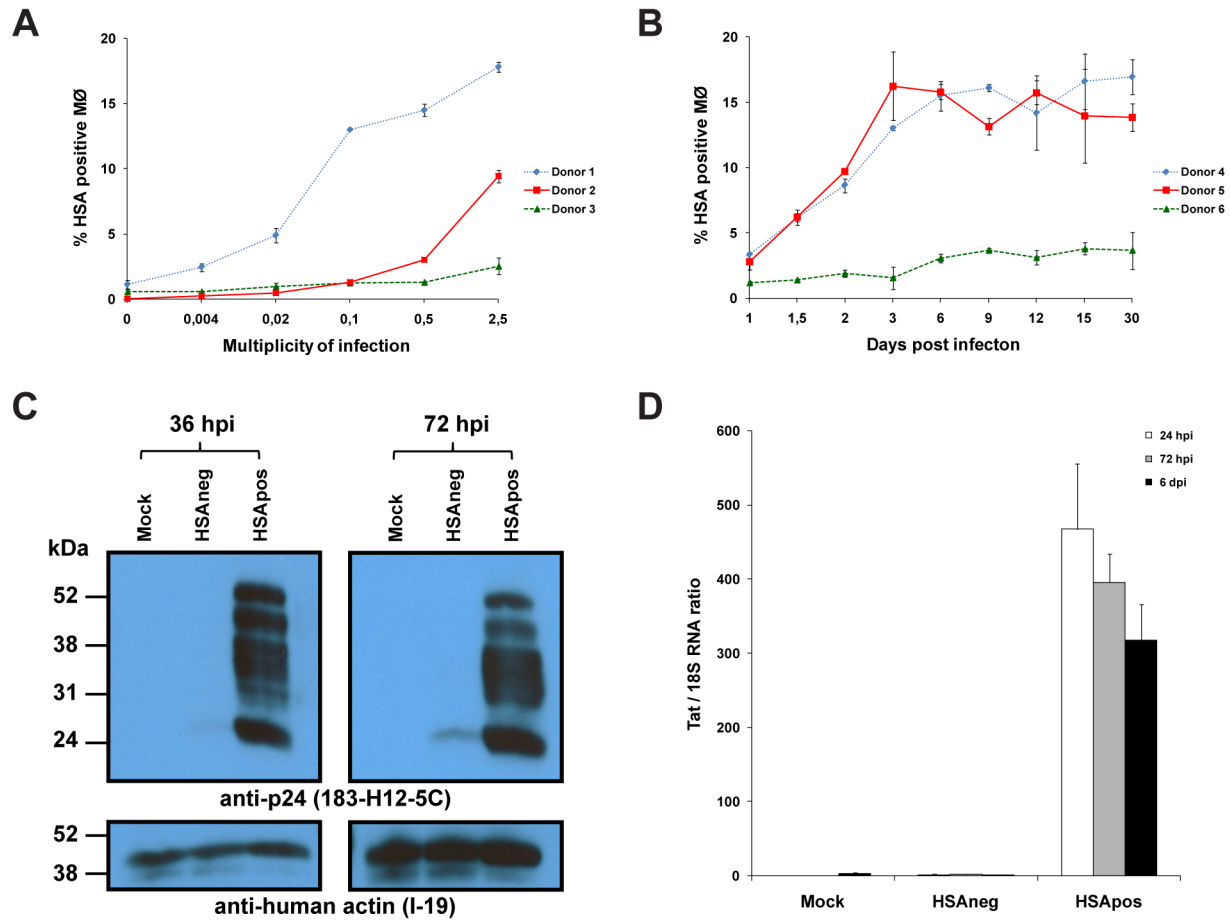

Figure S1

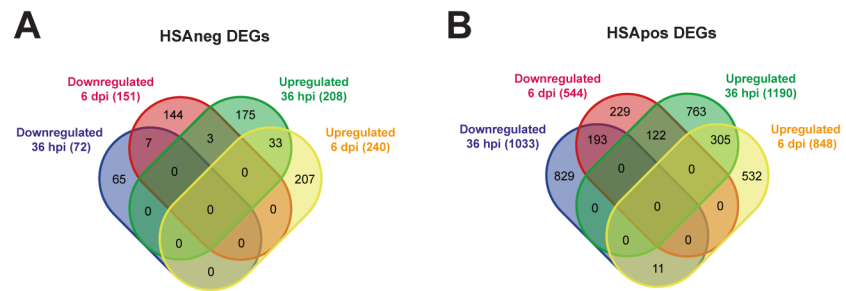

Figure S2

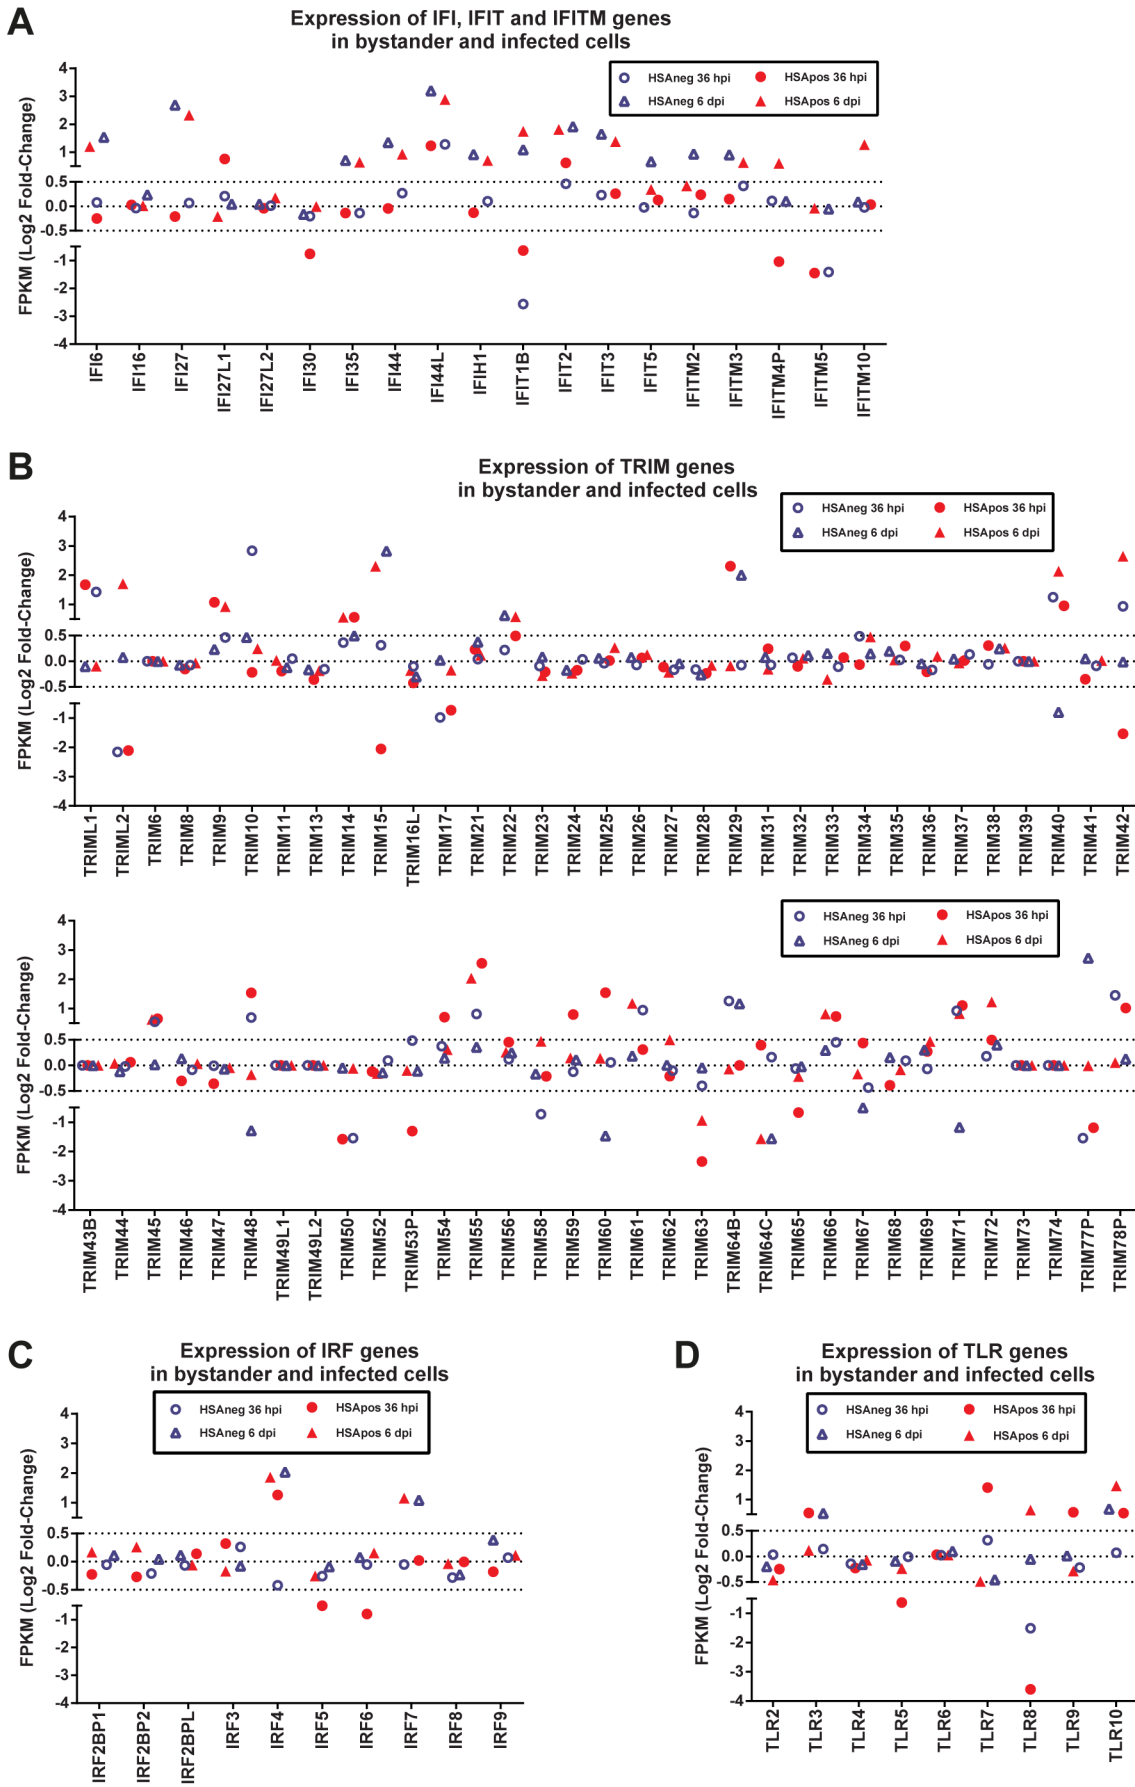

Figure S3



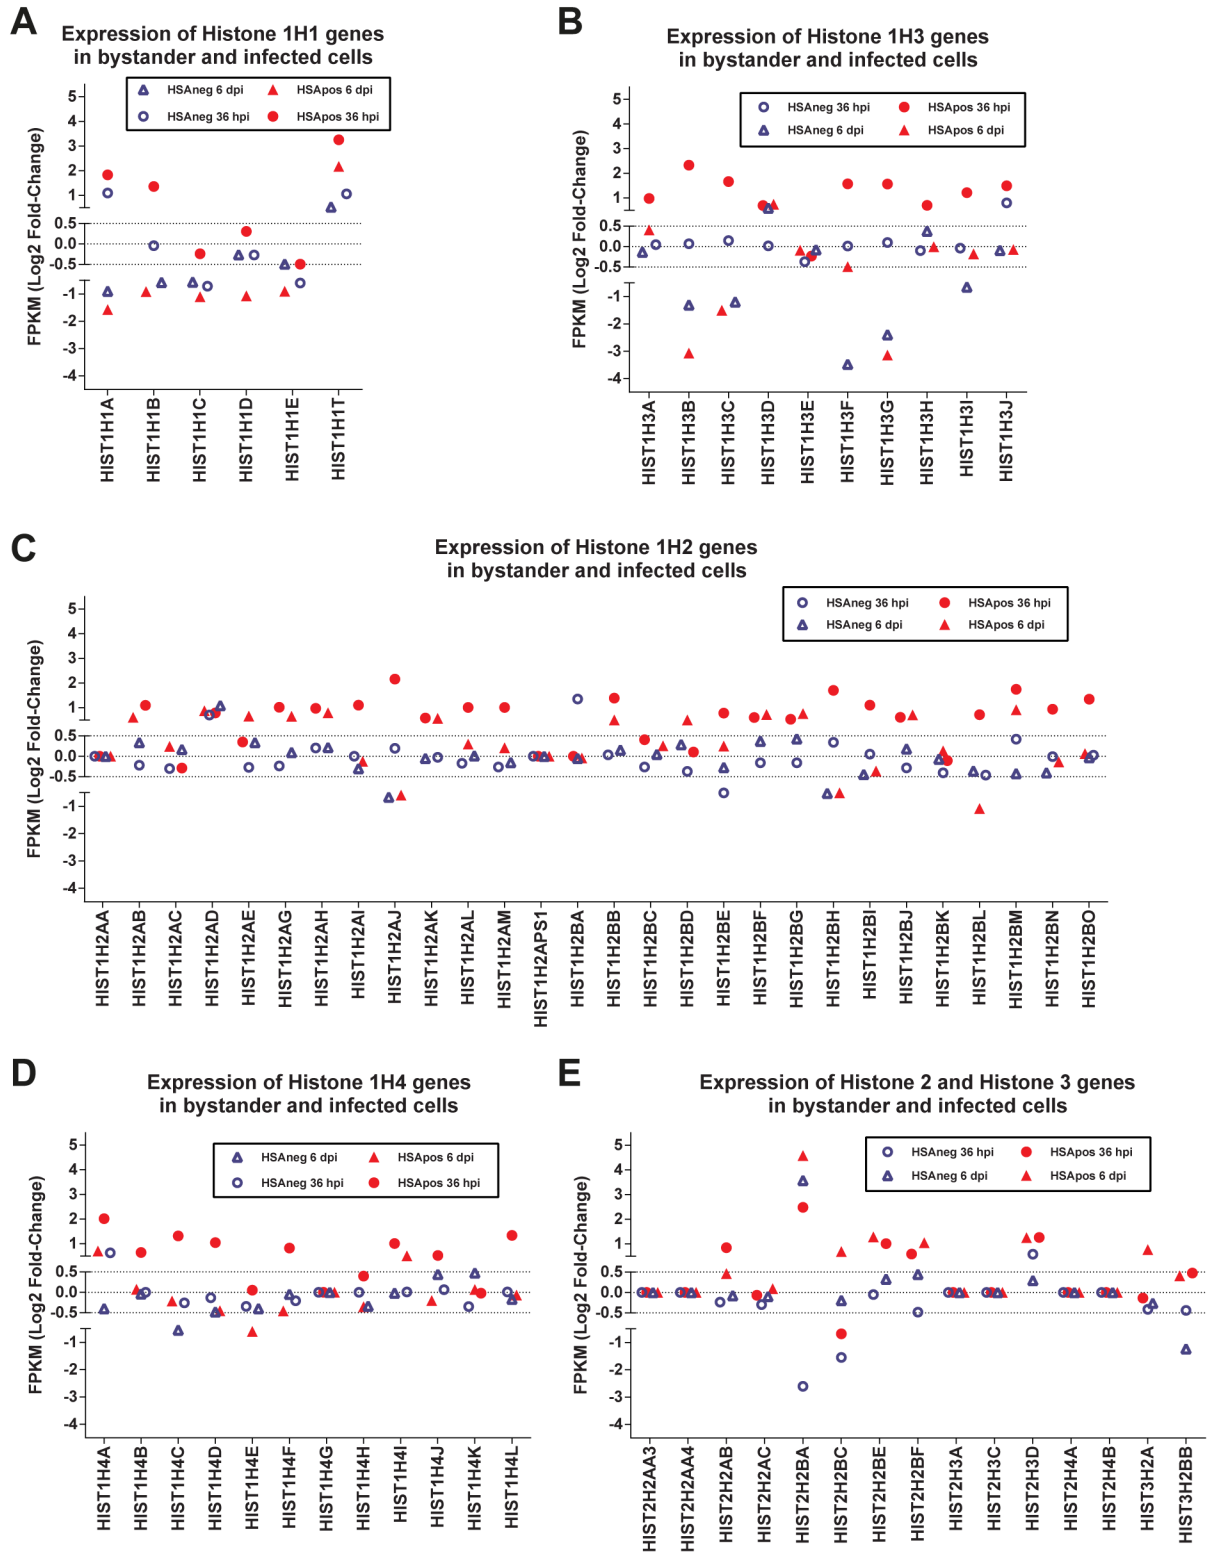

Figure S4

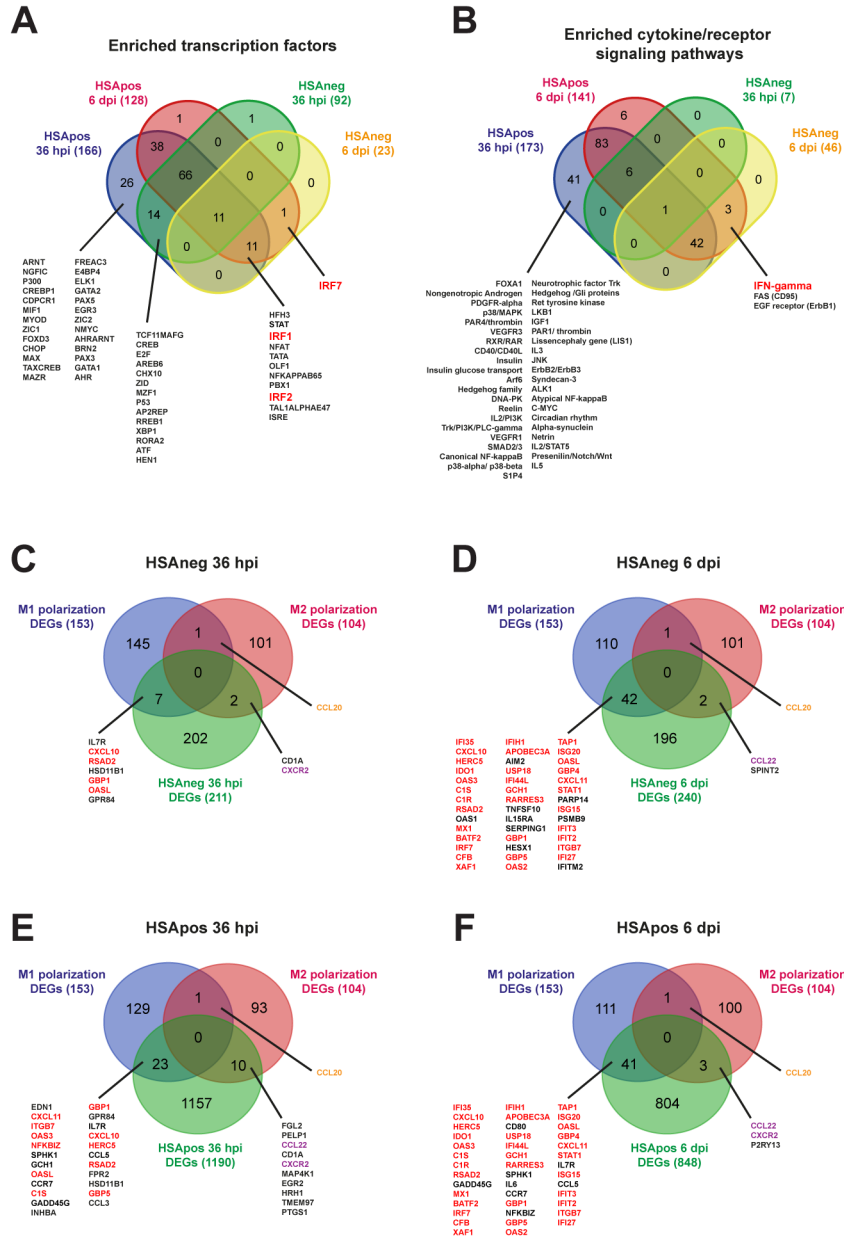

Figure S5

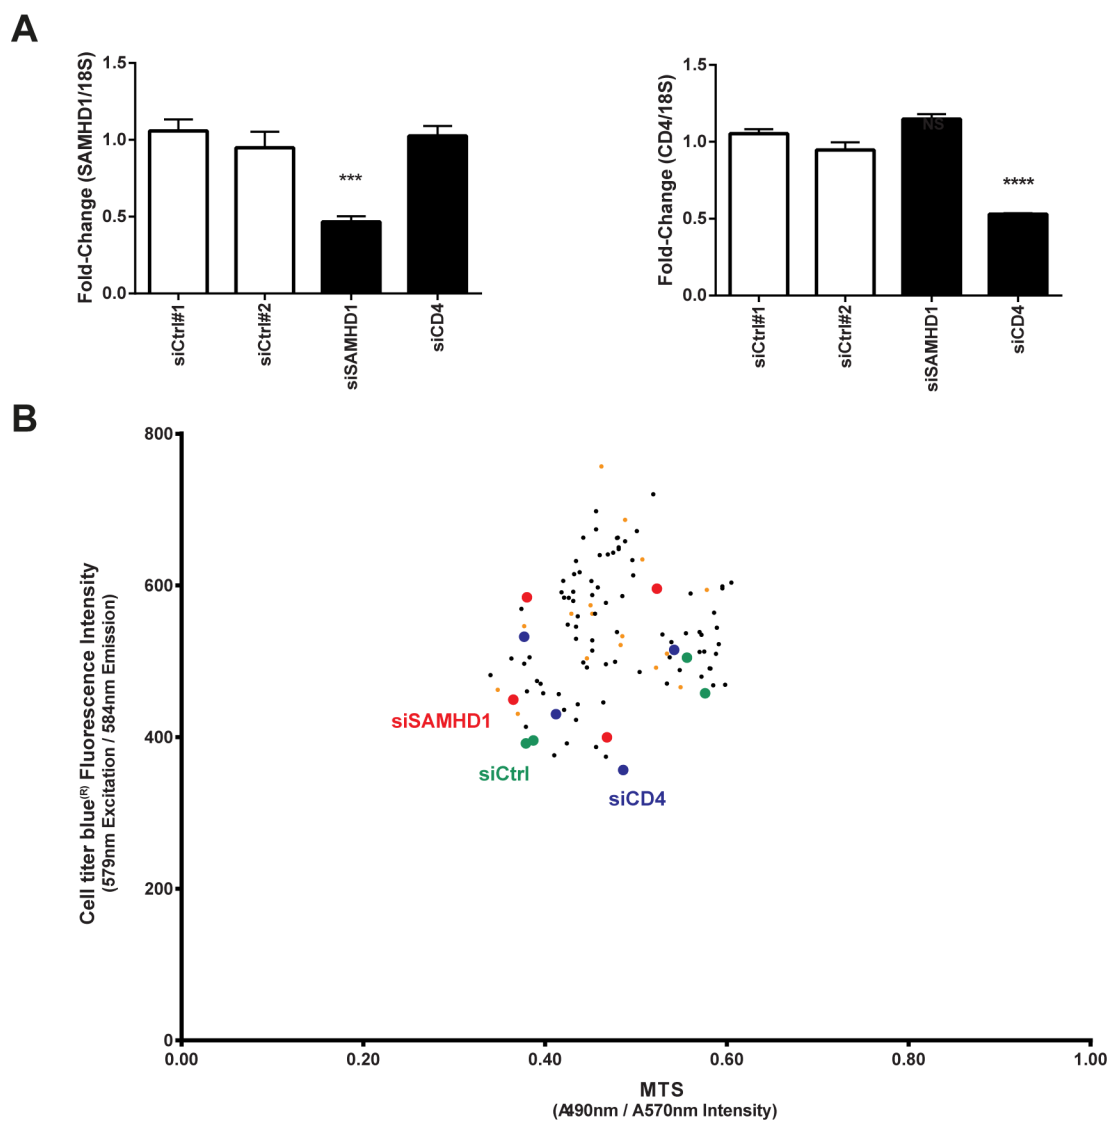

Figure S6

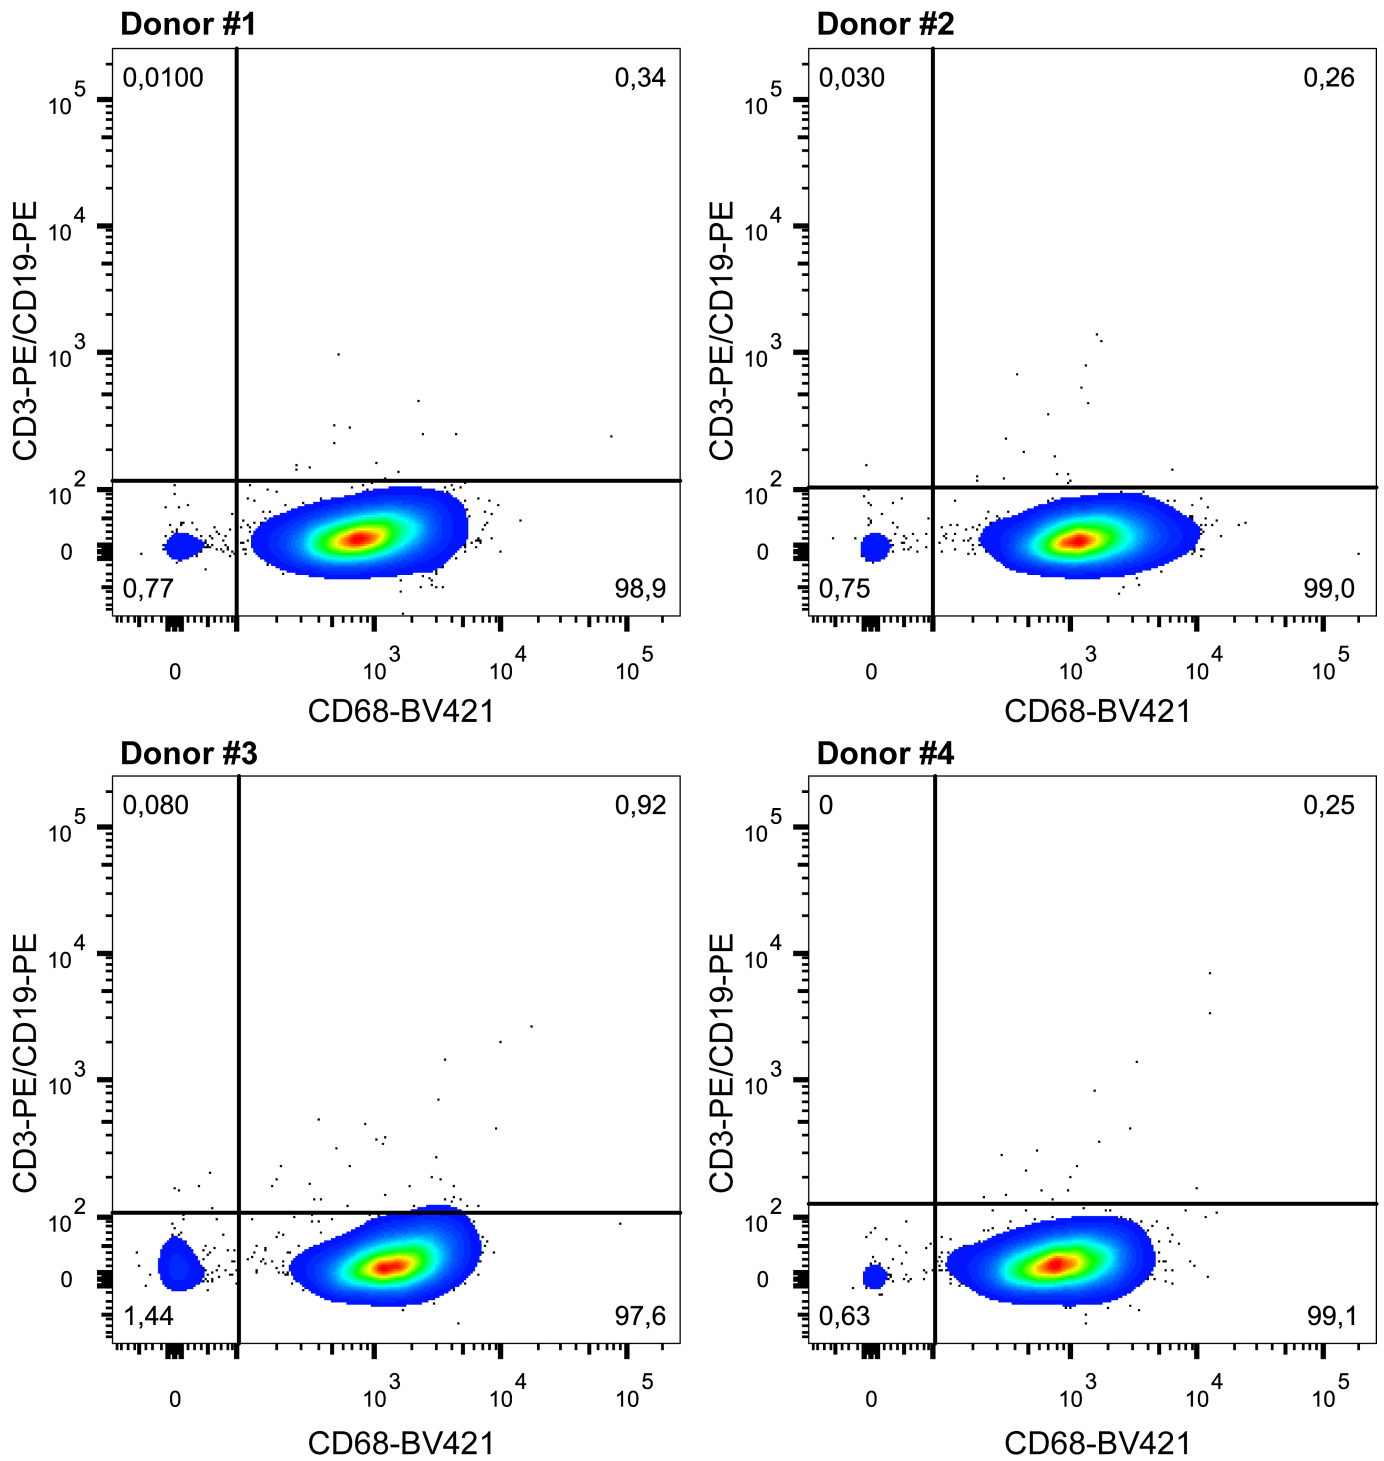

Figure S7
